# Supplementary material
Source: PubMed Central journal article supplement (PMC6191327)
Supplement: NIHMS985315-supplement-1.pdf [file NIHMS985315-supplement-1.pdf]

**Supplemental Table 1. The Effect of Transfusion and Hb on Changes in Fatigue by Baseline Fatigue Level and Age**

| Fatigue Level | Age<50 |           |             |      | 50≤Age<65 |           |             |      | Age≥65 |           |             |      |
|---------------|--------|-----------|-------------|------|-----------|-----------|-------------|------|--------|-----------|-------------|------|
|               | N=103  | Δ Fatigue | 95% CI      | p    | N=116     | Δ Fatigue | 95% CI      | p    | N=138  | Δ Fatigue | 95% CI      | p    |
| Median (≤28)  | 50     | -5.2      | (-13, 2.8)  | 0.20 | 62        | -0.47     | (-11, 10)   | 0.93 | 78     | 5.4       | (-1.5, 12)  | 0.13 |
| Median (>28)  | 53     | 4.5       | (-7.2, 16)  | 0.45 | 54        | -0.06     | (-13, 13)   | 0.99 | 60     | 2.0       | (-10, 14)   | 0.74 |
| 60% (>23)     | 61     | -6.5      | (-14, 0.88) | 0.08 | 67        | -0.18     | (-11, 10)   | 0.98 | 91     | 4.8       | (-2.0, 12)  | 0.16 |
| 40% (≤23)     | 42     | 7.8       | (-6.8, 22)  | 0.29 | 49        | 2.8       | (-10, 16)   | 0.66 | 47     | 1.4       | (-11, 14)   | 0.83 |
| 70% (>19)     | 69     | -6.2      | (-14, 1.3)  | 0.10 | 77        | -0.50     | (-11, 10)   | 0.93 | 102    | 4.8       | (-1.5, 11)  | 0.13 |
| 30% (≤19)     | 34     | 12        | (-5.3, 30)  | 0.16 | 39        | 4.8       | (-9.1, 19)  | 0.49 | 36     | -0.82     | (-15, 13)   | 0.91 |
| 80% (>14)     | 78     | -4.8      | (-12, 2.7)  | 0.21 | 91        | 0.43      | (-8.0, 8.9) | 0.92 | 114    | 5.5       | (-0.62, 12) | 0.08 |
| 20% (≤14)     | 25     | 23        | (4.5, 41)   | 0.02 | 25        | 12        | (-13, 37)   | 0.34 | 24     | 0.47      | (-24, 25)   | 0.97 |
| 90% (>8)      | 88     | -4.9      | (-12, 2.3)  | 0.18 | 101       | 1.5       | (-6.3, 9.2) | 0.71 | 129    | 4.1       | (-2.2, 11)  | 0.20 |
| 10% (≤8)      | 15     | 29        | (4, 55)     | 0.03 | 15        | 17        | (-20, 55)   | 0.32 | 9      | -46       | (-160, 68)  | 0.12 |

Linear regression controlling for: age, sex, length of stay, number of units of RBC transfused, Charlson Comorbidity Index score

Δ Fatigue=β coefficient for the interaction effect of transfusion x nadir Hb on the dependent variable change in fatigue (FACIT<sub>FU</sub> – FACIT<sub>inp</sub>)

**Supplemental Table 2. The Effect of Transfusion and Hb on Changes in Fatigue by Baseline Fatigue Quintiles (including patients with SC, DD, GIB)**

|                         | <b>Baseline FACIT Score</b> |             |              |                  |               |                |
|-------------------------|-----------------------------|-------------|--------------|------------------|---------------|----------------|
| <b>Unstratified</b>     | <b>N</b>                    | <b>Mean</b> | <b>Range</b> | <b>Δ Fatigue</b> | <b>95% CI</b> | <b>p-value</b> |
|                         | 513                         | 28          | 0-52         | 1.5              | (-1.4, 4.3)   | 0.32           |
| <b>Fatigue Quintile</b> | <b>N</b>                    | <b>Mean</b> | <b>Range</b> | <b>Δ Fatigue</b> | <b>95% CI</b> | <b>p-value</b> |
| 1 (Low)                 | 113                         | 46          | 41-52        | 0.79             | (-3.0, 4.6)   | 0.68           |
| 2                       | 100                         | 36          | 32-40        | 0.29             | (-5.6, 6.2)   | 0.82           |
| 3                       | 101                         | 28          | 24-31        | -2.6             | (-8.6, 3.4)   | 0.40           |
| 4                       | 94                          | 19          | 15-23        | 0.62             | (-6.9, 8.1)   | 0.87           |
| 5 (High)                | 105                         | 8.1         | 0-14         | 7.6              | (-0.29, 15)   | 0.06           |

Linear regression controlling for: age, sex, length of stay, number of units of RBC transfused, Charlson Comorbidity Index score, sickle cell anemia, gastrointestinal bleeding, major depressive disorder  
 $\Delta$  Fatigue= $\beta$  coefficient for the interaction effect of transfusion x nadir Hb on the dependent variable change in fatigue (FACIT<sub>FU</sub> – FACIT<sub>inp</sub>)

**Supplemental Table 3. The Effect of Transfusion and Hb on Changes in Fatigue by Baseline Fatigue Level (including patients with SC, DD, GIB)**

| Baseline (In-Hospital) |           | N=513 | $\Delta$ Fatigue | 95% CI      | p-value |
|------------------------|-----------|-------|------------------|-------------|---------|
| Fatigue Level          | FACIT     |       |                  |             |         |
| Median                 | $\geq 28$ | 264   | 0.04             | (-3.0, 3.1) | 0.98    |
| Median                 | $< 28$    | 249   | 1.9              | (-2.4, 6.3) | 0.38    |
| 60%                    | $> 23$    | 314   | -0.54            | (-3.4, 2.4) | 0.72    |
| 40%                    | $\leq 23$ | 199   | 3.2              | (-2.0, 8.5) | 0.23    |
| 70%                    | $> 19$    | 359   | -0.31            | (-3.1, 2.5) | 0.83    |
| 30%                    | $\leq 19$ | 154   | 5.5              | (-0.28, 11) | 0.06    |
| 80%                    | $> 14$    | 408   | 0.38             | (-2.4, 3.1) | 0.79    |
| 20%                    | $\leq 14$ | 105   | 7.6              | (-0.29, 15) | 0.06    |
| 90%                    | $> 8$     | 463   | 0.31             | (-2.4, 3.0) | 0.82    |
| 10%                    | $\leq 8$  | 50    | 12               | (-1.1, 25)  | 0.07    |

Linear regression controlling for: age, sex, length of stay, number of units of RBC transfused, Charlson Comorbidity Index score, sickle cell anemia, gastrointestinal bleeding, major depressive disorder  
 $\Delta$  Fatigue= $\beta$  coefficient for the interaction effect of transfusion x nadir Hb on the dependent variable change in fatigue (FACIT<sub>FU</sub> – FACIT<sub>inp</sub>)
